# Supplementary material for: Properties of Local Interactions and Their Potential Value in Complementing Genome-Wide Association Studies
Source: PLoS One. 2013 Aug 5;8(8):e71203. doi: 10.1371/journal.pone.0071203 (PMC3733963; doi:10.1371/journal.pone.0071203)
Supplement: Table S2 — Genome-wide significant single SNPs in ARIC and NFBC1966. (XLSX) [file pone.0071203.s003.xlsx]

## Sheet: TableS2
Table S2: Genome-wide significant single SNPs in ARIC and NFBC1966*
Trait	Cohort	SNP	chr	pos	N	P value
CRP	ARIC	rs4537545	1	154418879	7097	1.80328e-11
CRP	ARIC	rs2808629	1	159676796	7226	9.39854e-14
CRP	ARIC	rs2794520	1	159678816	7030	3.38808e-11
CRP	ARIC	rs16842599	1	159697475	7234	6.42277e-10
CRP	ARIC	rs7553007	1	159698549	7243	7.89715e-14
CRP	ARIC	rs11265260	1	159700039	7199	4.12432e-09
CRP	ARIC	rs780094	2	27741237	7239	4.89679e-12
CRP	ARIC	rs7953249	12	121403724	7243	3.85887e-08
CRP	ARIC	rs2393791	12	121423956	7242	1.28687e-10
CRP	ARIC	rs2259816	12	121435587	7223	3.15773e-09
CRP	ARIC	rs1169313	12	121442670	7243	6.9071e-09
CRP	NFBC1966	rs1811472	1	159642349	5251	2.1626e-12
CRP	NFBC1966	rs12093699	1	159647988	5254	6.86962e-11
CRP	NFBC1966	rs2592887	1	159652939	5234	4.23257e-14
CRP	NFBC1966	rs2794520	1	159678816	5255	1.71875e-17
CRP	NFBC1966	rs6917603	6	30017071	5189	8.54134e-16
CRP	NFBC1966	rs2650000	12	121388962	5253	5.7321e-11
CRP	NFBC1966	rs7953249	12	121403724	5254	3.00838e-10
CRP	NFBC1966	rs1169300	12	121431225	5252	3.05147e-09
CRP	NFBC1966	rs2464196	12	121435427	5240	2.48126e-09
CRP	NFBC1966	rs735396	12	121438844	5254	2.76196e-08
GLU	ARIC	rs780094	2	27741237	8194	3.33171e-09
GLU	ARIC	rs853770	2	169749841	8068	4.93495e-08
GLU	ARIC	rs563694	2	169774071	8154	1.62627e-18
GLU	ARIC	rs552976	2	169791438	8201	1.72846e-19
GLU	ARIC	rs472614	2	169792421	8199	2.84861e-09
GLU	ARIC	rs565412	2	169794283	8200	2.72533e-09
GLU	ARIC	rs567074	2	169794431	8199	2.49828e-10
GLU	ARIC	rs2685805	2	169797060	8095	1.6449e-10
GLU	ARIC	rs2685812	2	169798171	8178	7.86308e-10
GLU	ARIC	rs2685813	2	169798439	8191	4.97305e-10
GLU	ARIC	rs853789	2	169801488	8058	6.21516e-19
GLU	ARIC	rs853784	2	169803674	8200	9.76373e-11
GLU	ARIC	rs853780	2	169807482	8194	4.98185e-10
GLU	ARIC	rs853779	2	169809672	8126	2.57867e-10
GLU	ARIC	rs853778	2	169811224	8163	1.35482e-10
GLU	ARIC	rs853776	2	169813353	8189	2.34724e-10
GLU	ARIC	rs853773	2	169814347	8185	1.09678e-10
GLU	ARIC	rs853772	2	169814655	8197	4.1786e-10
GLU	ARIC	rs1799884	7	44229068	8195	1.11011e-10
GLU	ARIC	rs2908282	7	44248828	8126	1.89336e-09
GLU	ARIC	rs12792753	11	92668975	8201	1.85421e-12
GLU	ARIC	rs11523890	11	92679778	8110	3.15115e-13
GLU	ARIC	rs10765576	11	92706944	8197	1.45232e-08
GLU	ARIC	rs10830963	11	92708710	8008	6.64054e-19
GLU	NFBC1966	rs560887	2	169763148	4645	2.31673e-11
GLU	NFBC1966	rs563694	2	169774071	4644	1.59887e-08
GLU	NFBC1966	rs2971671	7	44211337	4642	2.78669e-08
GLU	NFBC1966	rs3847554	11	92668826	4624	3.41055e-10
HDL	ARIC	rs327	8	19819536	8664	3.31062e-12
HDL	ARIC	rs12679834	8	19820433	8355	1.67773e-11
HDL	ARIC	rs1569209	8	19830170	8466	5.64709e-10
HDL	ARIC	rs17482753	8	19832646	8659	8.23868e-13
HDL	ARIC	rs12682115	8	19847060	8649	3.01765e-12
HDL	ARIC	rs10503669	8	19847690	8660	8.64866e-13
HDL	ARIC	rs17410962	8	19848080	8654	4.08376e-09
HDL	ARIC	rs17489268	8	19852045	8661	5.21643e-14
HDL	ARIC	rs17411024	8	19852134	8592	6.16726e-10
HDL	ARIC	rs17411031	8	19852310	8660	6.49043e-14
HDL	ARIC	rs17411045	8	19852362	8662	2.1709e-14
HDL	ARIC	rs17489282	8	19852518	8665	2.74232e-14
HDL	ARIC	rs4922117	8	19852586	8663	3.37093e-14
HDL	ARIC	rs17411126	8	19855272	8664	6.42335e-14
HDL	ARIC	rs12541912	8	19859791	8606	7.37499e-09
HDL	ARIC	rs765547	8	19866274	8656	1.37093e-13
HDL	ARIC	rs1837842	8	19868290	8625	1.01621e-12
HDL	ARIC	rs1919484	8	19869676	8635	3.03428e-13
HDL	ARIC	rs7016880	8	19876746	8643	4.09997e-11
HDL	ARIC	rs964184	11	116648917	8429	5.10511e-09
HDL	ARIC	rs261332	15	58727325	8616	1.40232e-11
HDL	ARIC	rs485538	15	58741177	8345	3.01799e-08
HDL	ARIC	rs261336	15	58742418	8644	9.16301e-09
HDL	ARIC	rs9989419	16	56985139	8457	8.99123e-19
HDL	ARIC	rs247617	16	56990716	8660	1.0731e-54
HDL	ARIC	rs1532625	16	57005301	8599	2.00041e-35
HDL	ARIC	rs289715	16	57008508	8652	3.10792e-09
HDL	NFBC1966	rs6917603	6	30017071	4809	2.81592e-13
HDL	NFBC1966	rs1532085	15	58683366	4872	4.76721e-12
HDL	NFBC1966	rs9989419	16	56985139	4870	1.49779e-08
HDL	NFBC1966	rs3764261	16	56993324	4873	1.98832e-27
HDL	NFBC1966	rs1532624	16	57005479	4874	5.25574e-20
HDL	NFBC1966	rs7499892	16	57006590	4873	8.43226e-14
HDL	NFBC1966	rs1800961	20	43042364	4874	9.27587e-09
LDL	ARIC	rs4970834	1	109814880	8196	6.00652e-24
LDL	ARIC	rs629301	1	109818306	8539	2.46465e-23
LDL	ARIC	rs13392272	2	21217490	8473	9.38458e-12
LDL	ARIC	rs1469513	2	21259562	8536	8.48998e-15
LDL	ARIC	rs12714264	2	21265518	8536	3.53747e-14
LDL	ARIC	rs7575840	2	21273490	8548	2.09542e-11
LDL	ARIC	rs1429974	2	21300770	8548	6.60691e-11
LDL	ARIC	rs754523	2	21311691	8541	1.21822e-10
LDL	ARIC	rs97458	2	21327635	8543	4.24985e-10
LDL	ARIC	rs312970	2	21369815	8538	9.13527e-15
LDL	ARIC	rs11687710	2	21371068	8547	9.96886e-11
LDL	ARIC	rs527034	2	21382786	8538	7.65816e-15
LDL	ARIC	rs4560142	2	21383717	8542	4.22444e-15
LDL	ARIC	rs4591370	2	21383742	8549	8.04373e-15
LDL	ARIC	rs1712247	2	21383951	8549	1.12017e-14
LDL	ARIC	rs538928	2	21389019	8465	1.64986e-14
LDL	ARIC	rs576203	2	21393623	8544	3.02185e-15
LDL	ARIC	rs488507	2	21393689	8431	5.2e-15
LDL	ARIC	rs506585	2	21397182	8548	5.18697e-15
LDL	ARIC	rs478442	2	21399216	8549	1.14787e-14
LDL	ARIC	rs567071	2	21405790	8540	1.19449e-10
LDL	ARIC	rs365946	2	21439329	8479	1.72546e-11
LDL	ARIC	rs13387827	2	21469152	8549	2.34387e-08
LDL	ARIC	rs13398007	2	21469336	8411	6.70634e-09
LDL	ARIC	rs7703051	5	74625487	8549	1.97645e-08
LDL	ARIC	rs12654264	5	74648603	8545	1.52597e-08
LDL	ARIC	rs3846663	5	74655726	8548	1.50326e-08
LDL	ARIC	rs12052201	19	11159096	8464	1.37364e-08
LDL	ARIC	rs12052058	19	11159525	8528	2.16249e-08
LDL	ARIC	rs1122608	19	11163601	8530	1.82642e-08
LDL	ARIC	rs4803750	19	45247627	8545	2.13223e-11
LDL	NFBC1966	rs646776	1	109818530	4856	1.89831e-13
LDL	NFBC1966	rs693	2	21232195	4859	5.08198e-10
LDL	NFBC1966	rs754524	2	21311541	4857	1.6659e-08
LDL	NFBC1966	rs11668477	19	11195030	4857	7.05195e-09
TRI	ARIC	rs11902417	2	21198900	8665	3.7262e-09
TRI	ARIC	rs6544366	2	21204025	8665	5.11639e-09
TRI	ARIC	rs673548	2	21237544	8596	1.02978e-09
TRI	ARIC	rs1728918	2	27635463	8449	6.99748e-10
TRI	ARIC	rs780094	2	27741237	8658	1.29643e-14
TRI	ARIC	rs2074755	7	72877166	8659	1.57068e-08
TRI	ARIC	rs12539316	7	72977898	8644	1.6527e-08
TRI	ARIC	rs17145738	7	72982874	8665	8.88375e-09
TRI	ARIC	rs2286276	7	72987354	8665	8.6081e-09
TRI	ARIC	rs17145817	7	73046779	8663	4.45687e-08
TRI	ARIC	rs799165	7	73052057	8462	1.6682e-09
TRI	ARIC	rs327	8	19819536	8664	3.4683e-16
TRI	ARIC	rs12679834	8	19820433	8355	1.32245e-10
TRI	ARIC	rs2197089	8	19826373	8662	9.49063e-09
TRI	ARIC	rs1569209	8	19830170	8466	4.82253e-08
TRI	ARIC	rs17482753	8	19832646	8659	1.58674e-11
TRI	ARIC	rs12682115	8	19847060	8649	2.32651e-10
TRI	ARIC	rs10503669	8	19847690	8660	1.36952e-10
TRI	ARIC	rs17489268	8	19852045	8661	4.21525e-17
TRI	ARIC	rs17411031	8	19852310	8660	4.4155e-17
TRI	ARIC	rs17411045	8	19852362	8662	4.1578e-17
TRI	ARIC	rs17489282	8	19852518	8665	3.52332e-17
TRI	ARIC	rs4922117	8	19852586	8663	3.60618e-17
TRI	ARIC	rs17411126	8	19855272	8664	1.83611e-17
TRI	ARIC	rs12541912	8	19859791	8606	2.1241e-12
TRI	ARIC	rs1441766	8	19862788	8632	1.44629e-10
TRI	ARIC	rs765547	8	19866274	8656	6.17743e-18
TRI	ARIC	rs1837842	8	19868290	8625	2.02504e-16
TRI	ARIC	rs1919484	8	19869676	8635	8.75665e-18
TRI	ARIC	rs7016880	8	19876746	8643	2.8715e-11
TRI	ARIC	rs9644568	8	19928582	8659	1.85664e-08
TRI	ARIC	rs2980856	8	126476379	8665	3.3136e-08
TRI	ARIC	rs499790	11	116519739	8664	8.10057e-09
TRI	ARIC	rs481843	11	116525867	8661	3.70172e-12
TRI	ARIC	rs12799766	11	116558427	8663	9.89308e-09
TRI	ARIC	rs12279373	11	116600400	8664	1.77789e-16
TRI	ARIC	rs12280724	11	116613423	8612	3.99151e-16
TRI	ARIC	rs12280753	11	116613660	8545	1.46148e-14
TRI	ARIC	rs10488699	11	116632500	8551	1.25047e-16
TRI	ARIC	rs964184	11	116648917	8429	2.5007e-38
TRI	ARIC	rs12286037	11	116652207	8665	1.16402e-16
TRI	ARIC	rs6589566	11	116652423	8637	2.37823e-25
TRI	ARIC	rs3741298	11	116657561	8587	6.32871e-26
TRI	ARIC	rs651821	11	116662579	8649	1.9885e-22
TRI	ARIC	rs6589567	11	116670676	8664	9.89118e-14
TRI	ARIC	rs5128	11	116703640	8609	8.68382e-11
TRI	NFBC1966	rs1260326	2	27730940	4859	2.035e-08
TRI	NFBC1966	rs10096633	8	19830921	4873	3.29589e-09
*: highlighted SNPs appeared in a same trait in both cohorts
