# Supplementary material for: Properties of Local Interactions and Their Potential Value in Complementing Genome-Wide Association Studies
Source: PLoS One. 2013 Aug 5;8(8):e71203. doi: 10.1371/journal.pone.0071203 (PMC3733963; doi:10.1371/journal.pone.0071203)
Supplement: Table S3 — Profiling epistatic SNP pairs detected in eight metabolic traits in ARIC and NFBC1966. (XLSX) [file pone.0071203.s004.xlsx]

## Sheet: TableS3
Table S3: Profiling epistatic SNP pairs detected in eight metabolic traits in ARIC and NFBC1966*
	ARIC				NFBC1966
Trait	#Retained	#Plotted	#Local	%Local	#Retained	#Plotted	#Local	%Local
CRP	1309110	5500	1003	0.000766169	51709 (3.9%)	2305 (41.9%)	28 (2.8%)	0.000541492
DBP	1543564	6956	840	0.000544195	50273 (3.3%)	2274 (32.7%)	37 (4.4%)	0.000735982
GLU	1335851	5788	1000	0.000748586	50249 (3.8%)	2228 (38.5%)	0 (0.0%)	0
HDL	1293875	5577	950	0.000734229	46431 (3.6%)	2397 (43.0%)	21 (2.2%)	0.000452284
INS	1326280	5634	1005	0.000757759	49511 (3.7%)	2253 (40.0%)	0 (0.0%)	0
LDL	1328489	5834	989	0.000744455	46920 (3.5%)	2132 (36.5%)	32 (3.2%)	0.000682012
SBP	1341453	5530	874	0.000651532	49045 (3.7%)	2225 (40.2%)	13 (1.5%)	0.000265063
TRI	1291573	5684	942	0.000729343	50442 (3.9%)	2452 (43.1%)	23 (2.4%)	0.000455969
*:	#Retained - the total number of SNP pairs retained (Pint<1.0E-05)
	#Plotted - the total number of SNP pairs plotted in Fig. 1 (Pint<5.0E-08)
	#Local - the total number of local interaction SNP pairs (Pint<1.0E-05)
	%Local - the percentage of #Local out of #Retained in each cohort
	(percentage) - ratio of a count in NFBC1966 out of the counterpart in ARIC
